# Supplementary material for: High-fat feeding rather than obesity drives taxonomical and functional changes in the gut microbiota in mice
Source: Springer Nature journal article supplement (doi:10.1186/s40168-017-0258-6), 2017-04-08
Supplement: 40168_2017_258_MOESM11_ESM.pdf [file 40168_2017_258_MOESM11_ESM.pdf]

## Less abundant genera

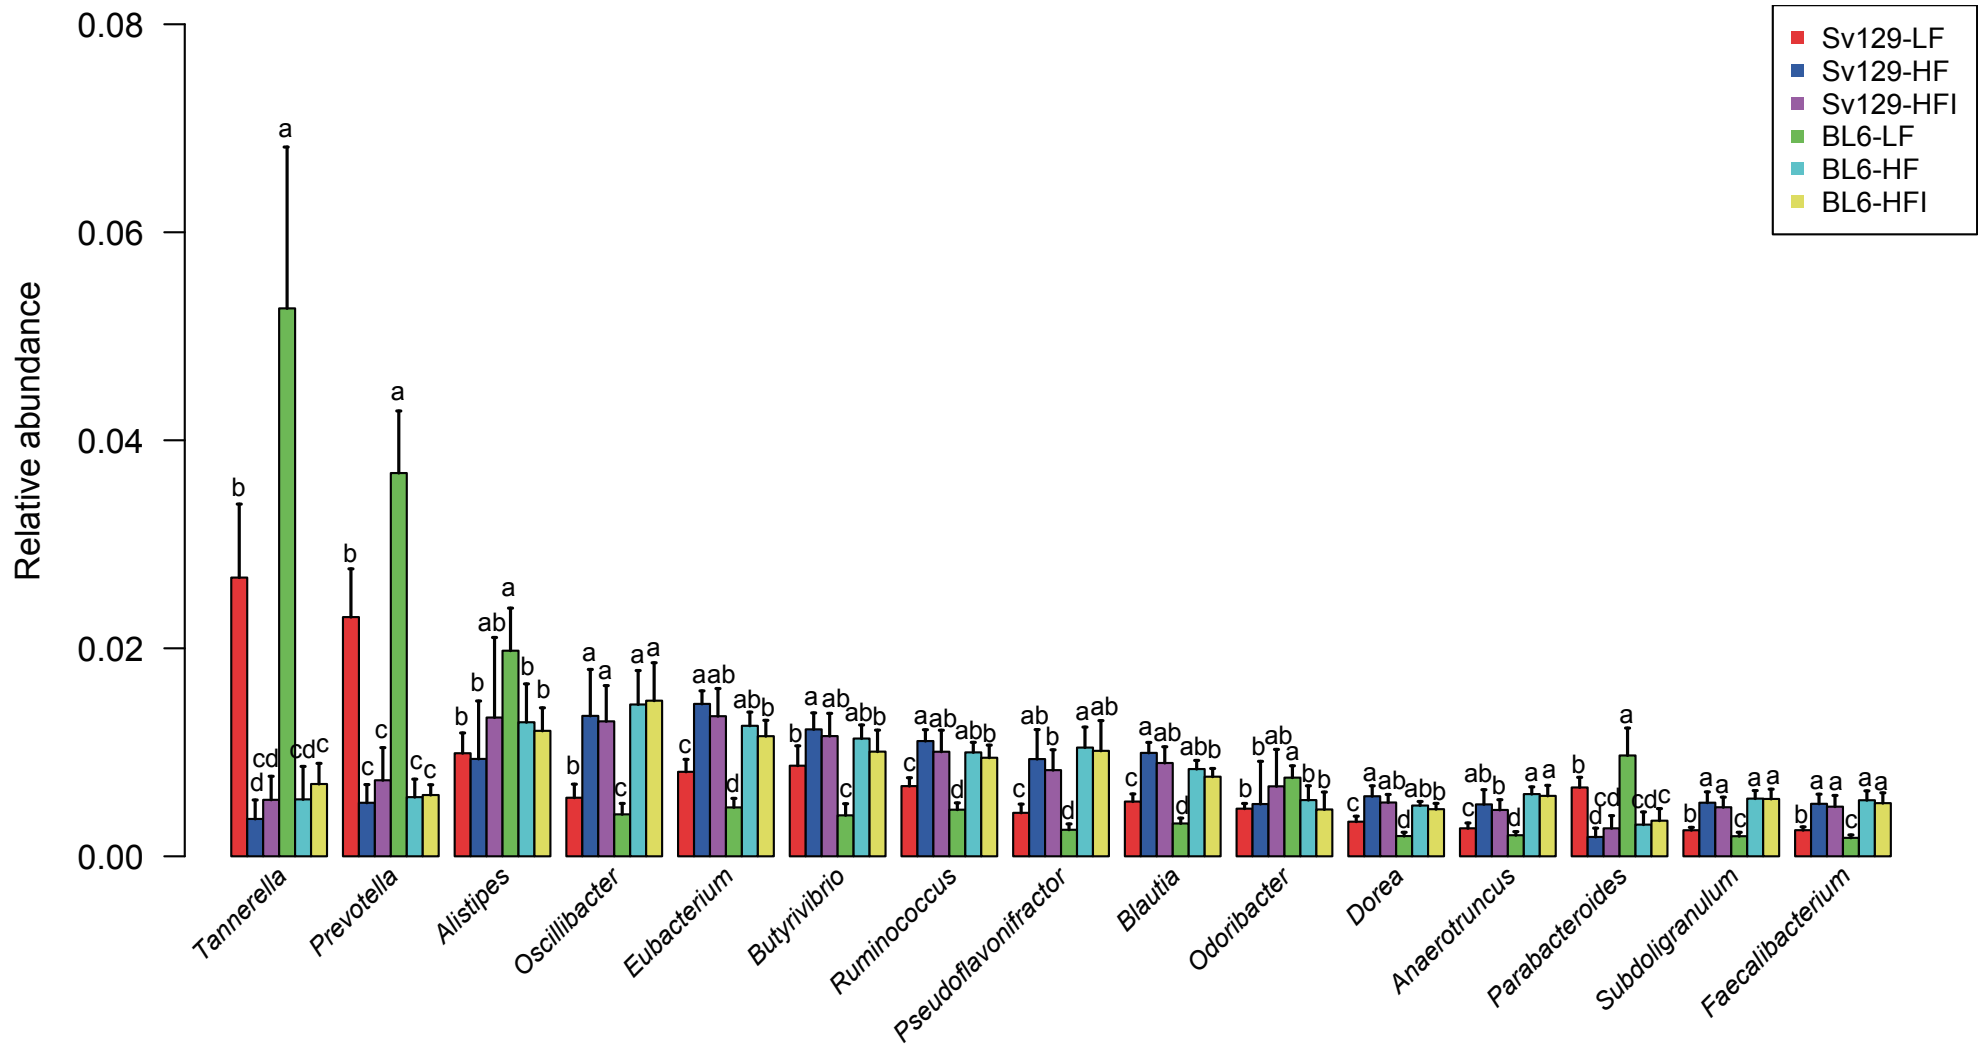

**Figure S9. Relative abundance of very low abundant genera in relation to mouse strain and diet.** The figure shows genera whose relative abundances were lower than 0.1%. Marked effects of diets were also observed in these low abundant genera. Statistical differences were analyzed by unpaired Wilcoxon Rank-Sum test (with FDR correction). Statistically significant differences ( $P < 0.05$ ) between groups are denoted with different letters (a, b, c, d) on the top of the graphic boxes.
