# Supplementary material for: High-fat feeding rather than obesity drives taxonomical and functional changes in the gut microbiota in mice
Source: Microbiome. 2017 Apr 8;5:43. doi: 10.1186/s40168-017-0258-6 (PMC5385073; doi:10.1186/s40168-017-0258-6)
Supplement: Supplementary file 17 — Diet-induced changes in module. (XLS 8 kb) [file 40168_2017_258_MOESM17_ESM.xls]

## Sheet: 工作表1
Table S5.Diet induced changes in module
Module	Enriched
Peptides/nickel transport system	HF
C5 isoprenoid biosynthesis, mevalonate pathway	HF
Methanogenesis, formate => methane	HF
V-type ATPase, prokaryotes	HF
Maltose/maltodextrin transport system	HF
Menaquinone biosynthesis, chorismate => menaquinone	LF
Aminoacyl-tRNA biosynthesis, eukaryotes	LF
Ribosome, bacteria	LF
Ribosome, archaea	LF
F-type ATPase, bacteria	LF
ATP synthase	LF
Putative ABC transport system	LF
Lipopolysaccharide biosynthesis, KDO2-lipid A	LF
Phosphatidylethanolamine (PE) biosynthesis, PA => PS => PE	LF
Pyridoxal biosynthesis, erythrose-4P => pyridoxal-5P	LF
2-oxoglutarate:ferredoxin oxidoreductase	LF
Tryptophan biosynthesis, chorismate => tryptophan	LF
Pantothenate biosynthesis, valine/L-aspartate => pantothenate	LF
Riboflavin biosynthesis, GTP => riboflavin/FMN/FAD	LF
